# Supplementary material
Source: publisher site journal article supplement (https://www.dovepress.com/article/589372)
Supplement: Supplementary file 1 [file 589372%20Supplementary%20Material.docx]

#
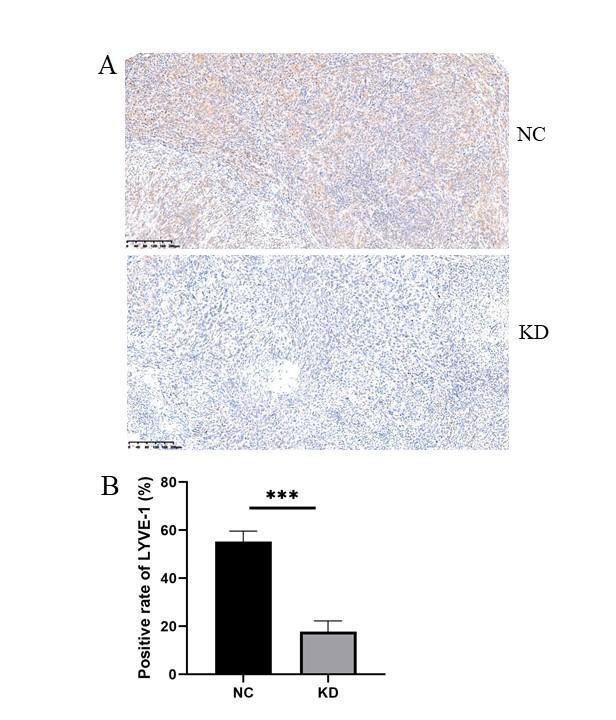


**Supplementary Figure 1 (A)** Immunohistochemical analysis of LYVE-1 was performed on subcutaneous xenograft tumor specimens to assess lymphatic vessel density. (B) The number of LYVE-1 positive vessels was quantified in five random high-power fields per tumor. *** P < 0.001. NC: Negative control group (non-targeting siRNA). KD: Knockdown group (siRNA targeting PDLIM1).
